# Supplementary material for: Structural and functional analysis of two small leucine-rich repeat proteoglycans, fibromodulin and chondroadherin
Source: PubMed Central journal article supplement (PMC5618690; doi:10.1016/j.matbio.2017.02.002), 2017-11
Supplement: mmc1.pdf [file mmc1.pdf]

**A**

| LRR  | Fibromodulin sequence                        | Length |
|------|----------------------------------------------|--------|
|      | <b>ECDCPPNF</b>                              |        |
| I    | <b>PTAMY</b> CDNRNLKYL <b>PFVPSR</b>         | 20     |
| II   | <b>MKYVYFQNNQI</b> TSIQEGVFDNATG             | 24     |
| III  | <b>LLWLIALHGNQI</b> TSDKVGRKVF <b>SKLRH</b>  | 26     |
| IV   | <b>LERLYLDHNNL</b> TRMPG <b>PLPRS</b>        | 21     |
| V    | <b>LRELHLDHNQI</b> SRVP <b>NALEGLN</b>       | 24     |
| VI   | <b>LTALYLQHNEIQE</b> VGSSMR <b>GLRS</b>      | 23     |
| VII  | <b>LILLDL</b> SYNHLR <b>KVDPGLPSA</b>        | 21     |
| VIII | <b>LEQLYMEHNNV</b> YTPDSY <b>FRGAPK</b>      | 24     |
| IX   | <b>LLYVRLSHNSL</b> TNNGLASNT <b>FNSSS</b>    | 25     |
| X    | <b>LLELDLSYNQLQ</b> KIP <b>VNTN</b>          | 20     |
| XI   | <b>LENLYLQGNRINE</b> FSIS <b>FTVVDVVNFSK</b> | 30     |
| XII  | <b>LQVLRRLDGNEIK</b> RSAMPADAP <b>LCRLA</b>  | 27     |
|      | <b>SLIEI</b>                                 |        |

**B**

| LRR            | Chondroadherin sequence                                                                                                   | Length |
|----------------|---------------------------------------------------------------------------------------------------------------------------|--------|
|                | <b>ACPQNCHCHSD</b>                                                                                                        |        |
| I              | <b>LQHVICDKVGLQ</b> KIP <b>KVSEK</b>                                                                                      | 20     |
| II             | <b>TKLLNLQRN</b> FPVLAANS <b>FRAMPN</b>                                                                                   | 24     |
| III            | <b>LVSLHLQHCQI</b> REVAAGAF <b>RGLKQ</b>                                                                                  | 24     |
| IV             | <b>LIYLYLSHNDI</b> RVLRAGAF <b>DDLTE</b>                                                                                  | 24     |
| V              | <b>ITYLYLDHNV</b> TELPRGLLS <b>SPLVN</b>                                                                                  | 24     |
| VI             | <b>LFILQLN</b> NKIRELRAGAF <b>QGAKD</b>                                                                                   | 24     |
| VII            | <b>LRWLYLSE</b> NALSSLQPGAL <b>DDVEN</b>                                                                                  | 24     |
| VIII           | <b>LAKFHVDRNQ</b> LSSYPSAALS <b>KLRV</b>                                                                                  | 24     |
| IX             | <b>VEELKLSHN</b> PLKSI <b>PDNAFQSFGRY</b>                                                                                 | 25     |
| X              | <b>LETLWLDNTN</b> LEKFS <b>DGAF LGVTT</b>                                                                                 | 24     |
| XI             | <b>LKHVHLENN</b> RNL <b>QLPSNFPFDS</b>                                                                                    | 22     |
| XII<br>(LRRCT) | <b>LETAL</b> TNN <b>PWKCTCQLRGLRRWLEAKASRP</b> DAT <b>CASPA</b><br><b>KFKGQHIRD</b> TDAFR <b>SCKFPTKRSK</b> KAGR <b>H</b> |        |

**Figure S1. Sequences of the LRRs in (A) fibromodulin and (B) chondroadherin.** The colouring scheme of the cap structures is the same as in **Figure 1**. The LRR consensus is highlighted in red and the repeat length indicated in the last column.
